# Supplementary material for: The Influence of Behavioral Sciences on Adherence to Physical Activity and Weight Loss in Overweight and Obese Patients: A Systematic Review of Randomized Controlled Trials
Source: MDPI journal article supplement (doi:10.3390/ijerph21050630), 2024-05-16
Supplement: s1 [file s1]

**Table S2.** Main findings and characteristics of studies on evidence from intervention studies.

| Author, year, country         | Study design, sample                                                                                                                       | Instruments                                                                                        | Intervention                                                                                                                                                                                                                                                                                                                                                                                                                      | Study quality | Outcome                                                                                                                                   |
|-------------------------------|--------------------------------------------------------------------------------------------------------------------------------------------|----------------------------------------------------------------------------------------------------|-----------------------------------------------------------------------------------------------------------------------------------------------------------------------------------------------------------------------------------------------------------------------------------------------------------------------------------------------------------------------------------------------------------------------------------|---------------|-------------------------------------------------------------------------------------------------------------------------------------------|
| Buscemi et al., 2014<br>(USA) | Prospective randomized control trial. 202 overweight or obese participants adults (men (85) and women (117), >18 years, overage 51 years). | Demographics and anthropometrics.<br><br>The Activity Level Questionnaire–Eating Version (ALQ–EV). | The multicompenet intervention by meetings for weight loss and the development of a healthy lifestyle involved three components: cognitive-behavioral, diet prescription and physical activity prescription in two intervention groups a) group with food reinforcement and b) group without food reinforcement (18 months).<br><br>48 hours of group meetings.<br><br>Weekly (months 1 to 6) and twice a month (months 7 to 18). | 70            | The intervention demonstrated weight reduction through reinforcement without food and physical activity in overweight and obese patients. |
| Glanz et al., 2019<br>(USA)   | Randomized controlled trial. 344 participants adults (men (97) and women (247), >18 years, overage 45 years).                              | Dietary behavior.<br><br>Physical activity.<br><br>Stages of change for weight loss.               | The multicomponent intervention study used a web-based platform to track the participants' weight changes (24 months).<br><br>The intervention groups were: 1) control and                                                                                                                                                                                                                                                        | 59            | The intervention proved effective in reducing the weight of the study participants.                                                       |

|                                            |                                                                                                                |                                                                                                                                                                                                                                                                                                            |                                                                                                                                                                                                                                                                            |    |                                                                                                                                                                               |
|--------------------------------------------|----------------------------------------------------------------------------------------------------------------|------------------------------------------------------------------------------------------------------------------------------------------------------------------------------------------------------------------------------------------------------------------------------------------------------------|----------------------------------------------------------------------------------------------------------------------------------------------------------------------------------------------------------------------------------------------------------------------------|----|-------------------------------------------------------------------------------------------------------------------------------------------------------------------------------|
|                                            |                                                                                                                | Intrinsic motivation/treatment self-regulation.                                                                                                                                                                                                                                                            | standard care (weight measurement and wellness guidance); 2) daily lottery incentives (weight loss); 3) environmental strategy of dietary care and physical activity; and 4) combination of environmental strategy and lottery incentives.                                 |    |                                                                                                                                                                               |
| Janssen et al., 2017 (USA)                 | Randomized controlled trial. 291 participants adults (men (145) and women (146), >18 years, overage 45 years). | Weight loss, mean net weight loss.<br><br>Cost calculations, total contact time at one site by multiplying the person-hours per session by the expected number of sessions at one site.<br><br>Total staffing costs, multiplied the total time spent on the intervention by hourly compensation for staff. | The multicomponent intervention was developed in two phases: group weight loss meetings with message framing, individual weight loss visits, and group exercise classes (18 months).<br><br>The two phases differed only in terms of the frequency of meetings and visits. | 69 | The intervention resulted in weight loss for participants attending community psychiatric rehabilitation programs.                                                            |
| Piepmeyer, Etnier & Fasczewski, 2018 (USA) | Randomized sample. 64 adults (men (30) and women (34), >18 years, overage 22 years).                           | Current Physical Activity Behaviour National Health Interview Survey.<br><br>Total of km cycled.<br><br>Polar Heart Rate monitor (F6 computer) with chest strap (T-31 Coded).                                                                                                                              | Message framing. Exposure to the 3-minute video "Exercise is Medicine™ - Keys to exercise - Exercise and your health" (30 min).<br><br>Three groups: 1) health (no additional information), 2) wealth (information that                                                    | 68 | The charity group intervention increased the participants' physical activity.<br><br>Women cycled further in the charity group, while men cycled further in the wealth group. |

|                           |                                                                                                             |                                                                                                                                     |                                                                                                                                                                                                                                                                                                      |    |                                                                                                                        |
|---------------------------|-------------------------------------------------------------------------------------------------------------|-------------------------------------------------------------------------------------------------------------------------------------|------------------------------------------------------------------------------------------------------------------------------------------------------------------------------------------------------------------------------------------------------------------------------------------------------|----|------------------------------------------------------------------------------------------------------------------------|
|                           |                                                                                                             | Borg Rating of Perceived Exertion Scale.                                                                                            | they would receive money per km cycled, and 3) charity (information that every 2 km they would convert the money earned to a charity)                                                                                                                                                                |    |                                                                                                                        |
|                           |                                                                                                             | Standard scale in behavioural economics research.                                                                                   |                                                                                                                                                                                                                                                                                                      |    |                                                                                                                        |
| Shaw et al., 2018 (USA)   | Randomized controlled trial. 188 participants adults,( >18 years).                                          | Weights daily, Withings scale.                                                                                                      | Intervention with lottery and financial incentives for weight loss and weight maintenance (6 months).<br><br>3 intervention groups: 1) lottery-based incentive, 2) financial incentive through direct payment, and 3) control through daily feedback without any incentive.                          | 29 | The study showed evidence of weight loss and weight maintenance in the participants.                                   |
| Snider et al., 2020 (USA) | Randomized controlled trial. 48 participants adults (men (17) and women (31), >18 years, overage 40 years). | Three-Factor Eating Questionnaire (TFEQ-R-18).<br><br>Positive and Negative Affect Schedule (PANAS).<br><br>Ad libitum eating task. | Intervention with message framing and financial incentives (3 hours).<br><br>1) appetizer tasting test, 2) preference rating.<br><br>5 attempts to adjust the delay discount.<br><br>The product combinations for each of the three tasks were (a) money-now/money-later, (b) snack-now/money-later, | 63 | The intervention demonstrated that a stressful situation increases reinforcement for snack food in obese participants. |

|                                            |                                                                                                                        |                                                                                                                                                                                               |                                                                                                                                                                                                                                                                                                                                                     |    |                                                                                                                        |
|--------------------------------------------|------------------------------------------------------------------------------------------------------------------------|-----------------------------------------------------------------------------------------------------------------------------------------------------------------------------------------------|-----------------------------------------------------------------------------------------------------------------------------------------------------------------------------------------------------------------------------------------------------------------------------------------------------------------------------------------------------|----|------------------------------------------------------------------------------------------------------------------------|
|                                            |                                                                                                                        |                                                                                                                                                                                               | and (c) snack-now/weight-loss-later.                                                                                                                                                                                                                                                                                                                |    |                                                                                                                        |
| Takebayashi et al., 2022 (Japan)           | Cluster randomized controlled trial. 122 participants adults (men (80) and women (42), >18 year, overage 35-39 years). | Survey of the three nudge groups:<br><br>Basic characteristics, number of subjects who had self-weighing habit after 6 months, changes in behavioral stage or mindset and weight maintenance. | Message framing intervention for regular self-weighing (6 months).<br><br>1 hour of workshops after being assigned to one of the nudge stimulus groups: 1) questionnaire group (attractive type nudges), 2) implementation intentions group (social type nudges) and 3) growth mindset group (timely type nudges), 4) reference group (no stimuli). | 44 | All the interventions were effective in regular self-weighing, but the growth mindset intervention was more effective. |
| van der Swaluw et al., 2018a (Netherlands) | Cluster randomized trial. 163 overweight participants adults (men (113) and women (50), >18 years, overage 48 years).  | Goal attainment (week gym attendance $\geq 2$ )                                                                                                                                               | Lottery with financial incentives intervention to increase physical activity in overweight adults (6 months).<br><br>1) Weekly short-term lotteries (13 weeks - 100 euros); 2) Combination of short-term and long-term lotteries (26 weeks - 5,400 euros); and 3) Control group with no lotteries.                                                  | 66 | The intervention proved effective in increasing physical activity in the short term.                                   |
| Van der Swaluw et al., 2018b (Netherlands) | Cluster randomized trial. 163 overweight participants adults                                                           | Goal-attainment (week-gym attendance $\geq 2$ )                                                                                                                                               | Lottery with financial incentives intervention to increase physical activity in                                                                                                                                                                                                                                                                     | 74 | Commitment lotteries can support regular gym attendance over the long term (up to 52 weeks).                           |

|                          |                                                                                                |                                                                                                                                                                                                                                 |                                                                                                                                                                                                                                                                                                         |    |                                                                                                                                                                                |
|--------------------------|------------------------------------------------------------------------------------------------|---------------------------------------------------------------------------------------------------------------------------------------------------------------------------------------------------------------------------------|---------------------------------------------------------------------------------------------------------------------------------------------------------------------------------------------------------------------------------------------------------------------------------------------------------|----|--------------------------------------------------------------------------------------------------------------------------------------------------------------------------------|
|                          | (men (113) and women (50), >18 years, overage 48 years).                                       | Scales to measure weight (KERNTM; 0.1% precision).                                                                                                                                                                              | overweight adults (6 months).                                                                                                                                                                                                                                                                           |    |                                                                                                                                                                                |
|                          |                                                                                                |                                                                                                                                                                                                                                 | 1) Weekly short-term lotteries (13 weeks - 100 euros); 2) Combination of short-term and long-term lotteries (26 weeks - 5,400 euros); and 3) Control group with no lotteries.                                                                                                                           |    |                                                                                                                                                                                |
| Zenko et al., 2016 (USA) | Randomized controlled trial. 46 adults (men (31) and women (15), >18 years, overage 28 years). | Feeling Scale.<br>Visual analog scale (VAS).<br>Empirical Valence Scale (EVS).<br>Physical Activity Enjoyment Scale (PACES).<br>Rating of Perceived Exertion (RPE).<br>Incidental and Planned Exercise Questionnaire (IPEQ-WA). | The physical exercise and psychological satisfaction intervention took place in laboratory visits: (a) maximal exercise test, (b) experimental exercise and (c) evaluation of the results (1 week).<br><br>2 groups of recumbent cycling tasks of increasing intensity (a) or decreasing intensity (b). | 59 | The intervention with the increasing intensity group showed a greater duration of pleasure and satisfaction in the post-exercise period as well as in the remembered pleasure. |

---
